# Supplementary material for: Two cluster-based metal–organic frameworks with selective detection of Hg2+ ion and magnetic properties
Source: Royal Society of Chemistry journal article supplement (doi:10.1039/d1ce00826a), 2021-01-01
Supplement: d1ce00826a1.pdf [file d1ce00826a1.pdf]

## Supplemental files

Two cluster-based metal-organic frameworks with selective detection of Hg<sup>2+</sup> ion and magnetic properties

Qingfang Lin, Zhihui Zong, Jing Tong, Wen Xie and Lili Liang\*

*Department of Chemistry, Bengbu Medical College, Bengbu 233030, P. R. China.*

### Contents:

1. Materials and Methods
2. Table S1 Selected Bond Lengths (Å) and Bond Angles (°) in **1-2**.
3. Fig. S1 The asymmetric unit of compound **1**.
4. Fig. S2 Coordination modes of Cd1 and Cd2 in **1**.
5. Fig. S3 The XPS for Mn<sup>III</sup> ions of compound **2**.
6. Fig. S4 Powder XRD patterns of **1** and **2**.
7. Fig. S5 TGA-DSC curves of **1** and **2** under nitrogen.
8. Fig. S6 The fluorescence spectra of **1** in DMSO at room temperature

### Materials and Methods

All reagents and solvents were of commercial origin and used without further purification. The ligand **L** was synthesized according to the literature<sup>1</sup>. Mn(BF<sub>4</sub>)<sub>2</sub>·4H<sub>2</sub>O were synthesized by the reaction of MnCO<sub>3</sub> and HBF<sub>4</sub>. A Bruker Apex Smart APEX II X-ray single crystal diffractometer was used to collect the X-ray crystallographic data. Elemental analyses of C, H and N were performed on a Perkin-Elmer 240C Elemental Analyzer. Powder X-ray diffraction (PXRD) were recorded on a Bruker D8 diffractometer equipped with monochromatized Cu-Kα ( $\lambda = 1.5418 \text{ \AA}$ ) radiation at room temperature with a scan speed of 5°/min. IR spectra were recorded with a NICOLET iS50 FT-IR spectrometer with KBr pellets in the range of 4000 to 400 cm<sup>-1</sup>. The direct current magnetic data were measured at temperature between 2.0 and 300 K on MPMS-XL7 SQUID magnetometer. Experimental susceptibilities were corrected for the diamagnetism estimated Pascal's tables and for sample holder by previous calibration. Fluorescence emission spectra were investigated on a Perkin

Elmer LS55 fluorescence luminescence spectrophotometer under the same measurement conditions. Thermogravimetric analyses (TGA) were carried out on an STA 449-F5 analyzer under N<sub>2</sub> atmosphere at a heating rate of 10 °C·min<sup>-1</sup> from room temperature to 800 °C. XPS was performed by utilizing an apparatus (Thermo Scientific, K-Alpha) with an Al Ka X-ray source.

Table S1 Selected bond lengths (Å) and bond angles (°) in **1-2**

| 1                                                                                                                                  |            |                        |            |                          |            |
|------------------------------------------------------------------------------------------------------------------------------------|------------|------------------------|------------|--------------------------|------------|
| Cd(1)-Br(1)                                                                                                                        | 3.0151(12) | Cd(1)-Br(1)#1          | 3.0152(12) | Cd(1)-Br(1)#2            | 3.0152(12) |
| Cd(2)-N(1)                                                                                                                         | 2.302(7)   | Cd(2)-N(4)#4           | 2.367(7)   | Cd(2)-N(6)#5             | 2.304(7)   |
| Cd(1)-Br(1)#3                                                                                                                      | 3.0152(12) | Cd(1)-Br(3)            | 2.461(2)   | Cd(1)-Br(3)#3            | 2.461(2)   |
| Cd(2)-Br(1)                                                                                                                        | 2.7454(13) | Cd(2)-Br(2)            | 2.5525(14) |                          |            |
| Br(1)-Cd(1)-Br(1)#2                                                                                                                | 177.48(4)  | Br(1)-Cd(1)-Br(1)#3    | 90.027(1)  | Br(1)#2-Cd(1)-Br(1)#1    | 90.028(1)  |
| Br(1)#2-Cd(1)-Br(1)#3                                                                                                              | 90.028(1)  | Br(1)-Cd(1)-Br(1)#1    | 90.029(1)  | Br(1)#1-Cd(1)-Br(1)#3    | 177.48(4)  |
| Br(3)#3-Cd(1)-Br(1)                                                                                                                | 88.742(19) | Br(3)#3-Cd(1)-Br(1)#3  | 91.258(19) | Br(3)-Cd(1)-Br(1)#1      | 88.742(19) |
| Br(3)-Cd(1)-Br(1)#2                                                                                                                | 91.258(19) | Br(3)-Cd(1)-Br(1)      | 91.258(19) | Br(3)#3-Cd(1)-Br(1)#2    | 88.742(19) |
| Br(3)-Cd(1)-Br(1)#3                                                                                                                | 88.742(19) | Br(3)#3-Cd(1)-Br(1)#1  | 91.258(19) | Br(3)-Cd(1)-Br(3)#3      | 180.0      |
| Br(2)-Cd(2)-Br(1)                                                                                                                  | 117.99(5)  | N(1)-Cd(2)-Br(1) N(1)- | 85.87(18)  | N(1)-Cd(2)-Br(2) N(4)#4- | 107.77(19) |
| N(1)-Cd(2)-N(4)#4                                                                                                                  | 81.2(3)    | Cd(2)-N(6)#5           | 141.6(3)   | Cd(2)-Br(1) N(6)#5-      | 142.78(19) |
| N(4)#4-Cd(2)-Br(2)                                                                                                                 | 99.19(19)  | N(6)#5-Cd(2)-Br(1)     | 86.41(18)  | Cd(2)-Br(2)              | 109.0(2)   |
| Symmetry codes: #1 -y+1/2, x, -z-1/2 #2 -x+1/2,-y+1/2,z #3 y,-x+1/2,-z-1/2 #4 -x+1,-y,-z #5 x,y,z-1 #6 x,y,z+1                     |            |                        |            |                          |            |
| 2                                                                                                                                  |            |                        |            |                          |            |
| Mn(1)-O(1)#3                                                                                                                       | 2.172(2)   | Mn(1)-O(1)#5           | 2.172(2)   | Mn(1)-N(1)               | 2.224(7)   |
| Mn(1)-O(1)#4                                                                                                                       | 2.172(2)   | Mn(1)-O(2)             | 2.0810(8)  | O(2)-Mn(1)#6             | 2.0811(9)  |
| Mn(1)-O(1)                                                                                                                         | 2.172(2)   |                        |            |                          |            |
| O(1)-Mn(1)-O(1)#5                                                                                                                  | 91.79(15)  | O(1)#4-Mn(1)-O(1)#     | 91.79(15)  | O(1)#5-Mn(1)-O(1)#3      | 88.08(15)  |
| O(1)-Mn(1)-O(1)#4                                                                                                                  | 88.08(15)  | O(1)#5-Mn(1)-O(1)#     | 176.26(14) | O(1)-Mn(1)-O(1)#3        | 176.26(14) |
| O(1)-Mn(1)-N(1)                                                                                                                    | 94.7(4)    | O(1)#4-Mn(1)-N(1)      | 85.2(4)    | O(1)#5-Mn(1)-N(1)        | 91.1(4)    |
| O(1)#3-Mn(1)-N(1)                                                                                                                  | 81.5(4)    | O(2)-Mn(1)-O(1)#3      | 91.87(7)   | O(2)-Mn(1)-O(1)#5        | 91.87(1)   |
| O(2)-Mn(1)-O(1)#4                                                                                                                  | 91.87(7)   | O(2)-Mn(1)-O(1)        | 91.87(7)   | O(2)-Mn(1)-N(1)          | 72.7(3)    |
| Mn(1)#7-O(2)-Mn(1)                                                                                                                 | 120.001(1) | Mn(1)#8-O(2)-Mn(1)     | 119.999(1) | Mn(1)#8-O(2)-Mn(1)#7     | 120.0      |
| Symmetry codes: #1 -y+1,-x+1,z #2 y,x,-z #3 -x+y,y,-z+1/2 #4 -x+y,y,z #5 x,y,-z+1/2 #6 -y,-x,z #7 -y+1,x-y+1,z #8 -x+y,-x+1,-z+1/2 |            |                        |            |                          |            |

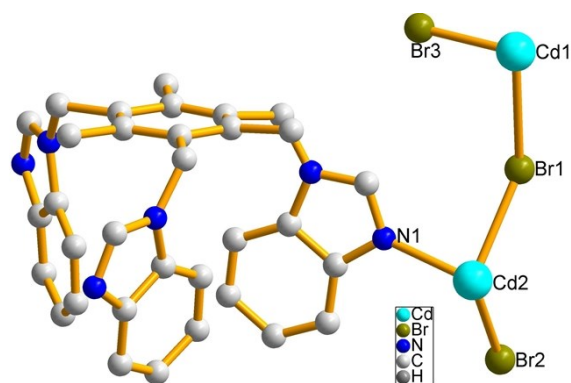

**Fig. S1.** The asymmetric unit of compound **1** showing the clearly resolved ligand L; atom Cd1 is at site with crystallographically-imposed  $\bar{4}$  symmetry while Br3 lies on the twofold axis which also passes through Cd1.

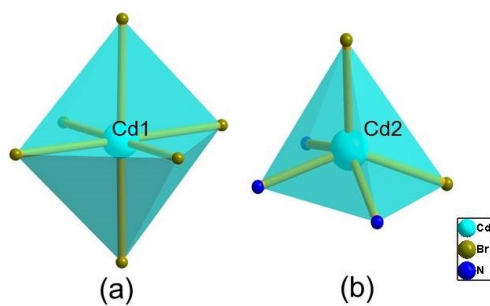

**Fig. S2** Coordination modes of Cd1 and Cd2 in **1**.

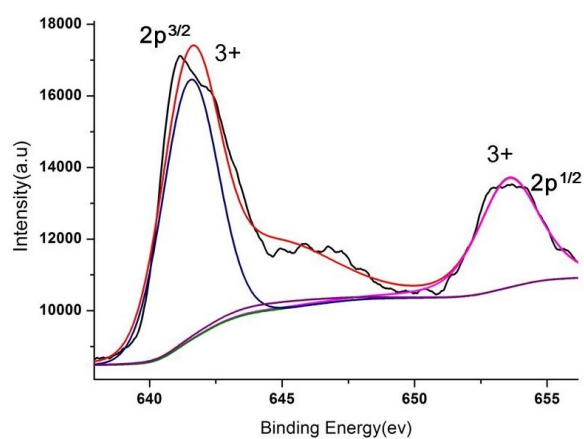

**Fig. S3** The XPS for Mn<sup>III</sup> ions of compound **2**.

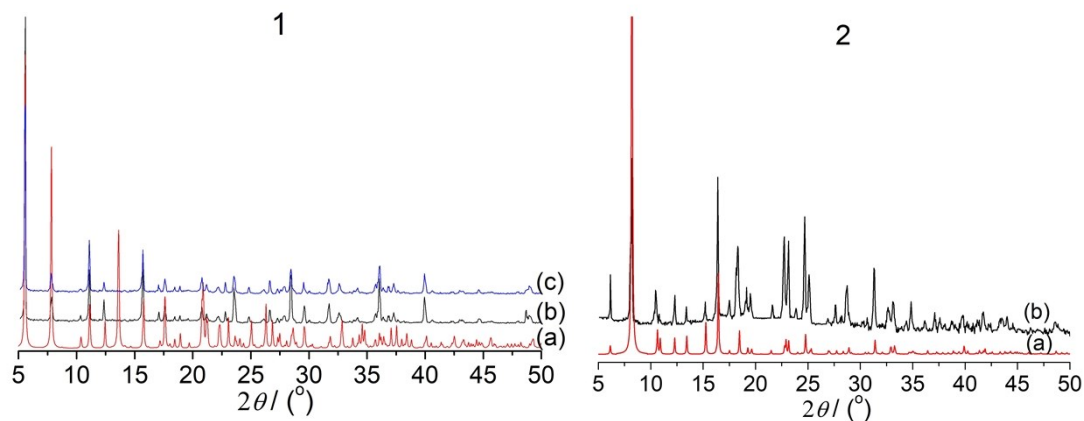

**Fig. S4** Powder XRD patterns for **1** and **2**, (a) simulated, (b) as-synthesized, (c) after the sensing experiments.

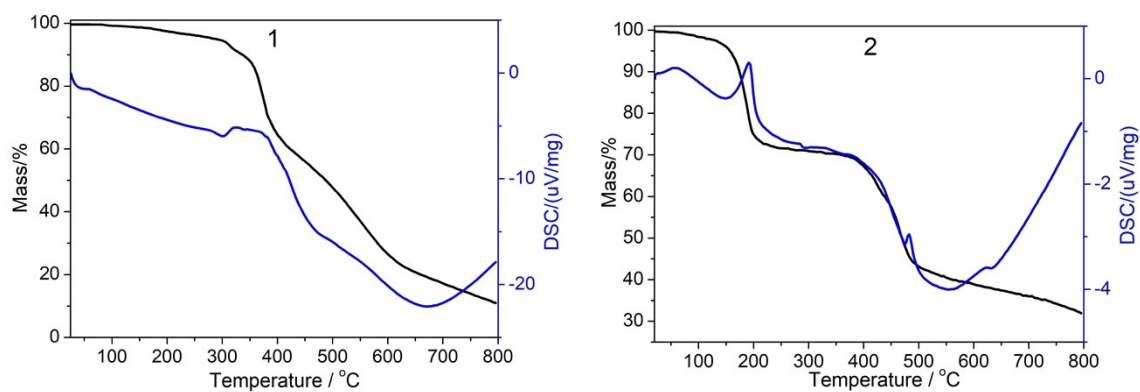

**Fig. S5** TGA-DSC curves of **1** and **2** under nitrogen.

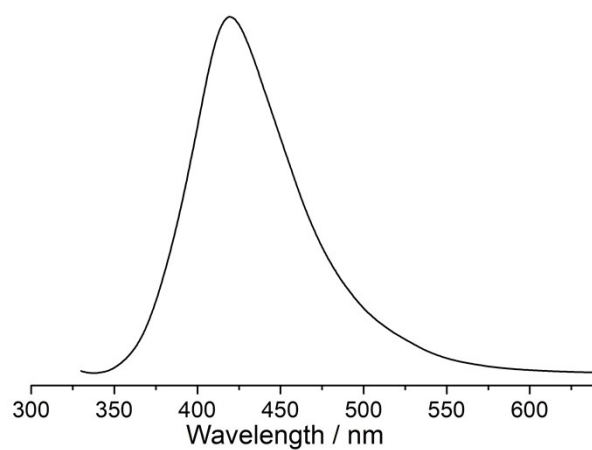

**Fig. S6** The fluorescence spectra of **1** in DMSO at room temperature.

## Reference

1. C. Y. Su, Y. P. Cai, C. L. Chen, M. D. Smith, W. Kaim and H. C. Zur Loye, *J. Am. Chem. Soc.*, 2003, **125**, 8595-8613.
